# Supplementary material for: First evidence of overlaps between HIV-Associated Dementia (HAD) and non-viral neurodegenerative diseases: proteomic analysis of the frontal cortex from HIV+ patients with and without dementia
Source: PubMed Central journal article supplement (PMC2904315; doi:10.1186/1750-1326-5-27), 2010-06-24

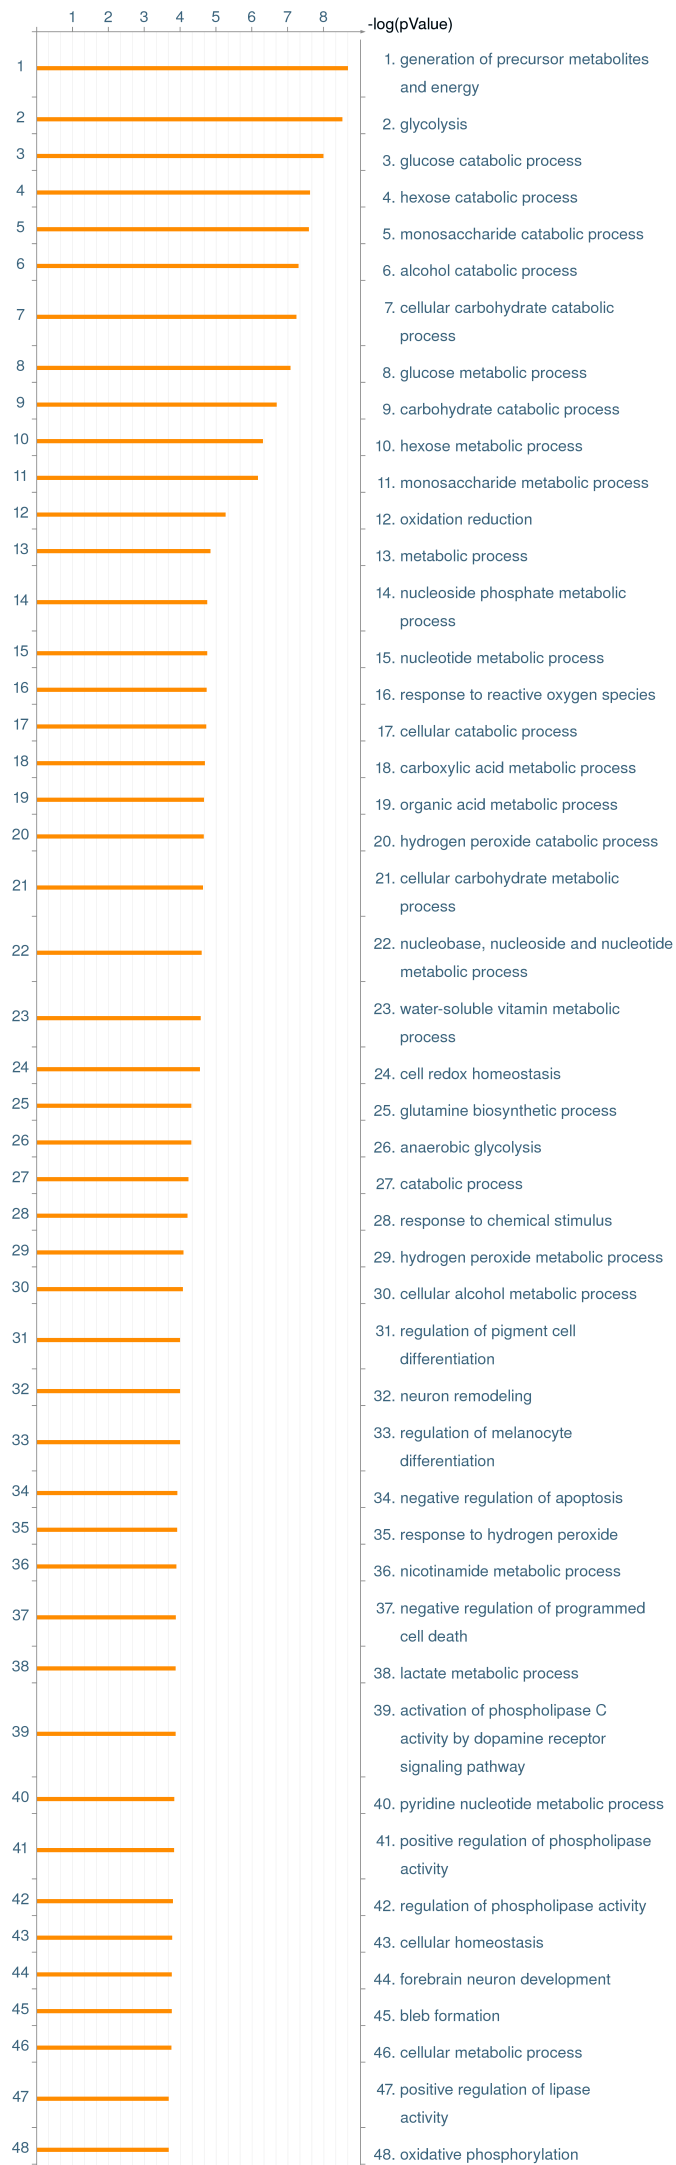

Supplement: 1750-1326-5-27-S3.pdf [file 1750-1326-5-27-S3.pdf]
