# Supplementary material for: First evidence of overlaps between HIV-Associated Dementia (HAD) and non-viral neurodegenerative diseases: proteomic analysis of the frontal cortex from HIV+ patients with and without dementia
Source: PubMed Central journal article supplement (PMC2904315; doi:10.1186/1750-1326-5-27), 2010-06-24
Supplement: 1750-1326-5-27-S4.pdf [file 1750-1326-5-27-S4.pdf]

| Group <sup>a</sup> | Sample ID | Labeling dye | Sex <sup>b</sup> | Age at death | ART/ARV                                                                   | Non-HIV neuropathology               | Duration from seropositive for HIV to death (year) |
|--------------------|-----------|--------------|------------------|--------------|---------------------------------------------------------------------------|--------------------------------------|----------------------------------------------------|
| HAD                | 7766      | Cy5          | M                | 38           | N/A                                                                       | N/A                                  | 12                                                 |
|                    | 2057      | Cy3          | M                | 45           |                                                                           |                                      |                                                    |
|                    | 2453      | Cy3          | M                | 63           |                                                                           |                                      |                                                    |
|                    | MW        | Cy5          | M                | 23           | AZT, DDI                                                                  |                                      | 3/4                                                |
|                    | 1121      | Cy5          | M                | 42           | N/A                                                                       | Leukoencephalopathy                  | 19                                                 |
|                    | 2434      | Cy3          | M                | 62           |                                                                           |                                      |                                                    |
|                    | 7659      | Cy5          | M                | 32           |                                                                           | N/A                                  | 9                                                  |
|                    | Gc16      | Cy3          | M                | U            |                                                                           |                                      |                                                    |
|                    | H0011gm   | Cy3          | M                | U            |                                                                           |                                      |                                                    |
| HAnD               | 2012      | Cy5          | M                | 49           | NVP, NFV, ZDV, SQV, D4T, 3TC, FTV, DDI, RTV, NVP, ABC, CBV, APV, TZV, KTA | Minimal non-diagnostic abnormalities | 10                                                 |
|                    | CA303     | Cy3          | M                | 67           |                                                                           | N/A                                  |                                                    |
|                    | CC163     | Cy3          | M                | 45           | 3TC, ABC, KTA, NFV, RTV, TFV                                              | N/A                                  | 21                                                 |
|                    | Ca247     | Cy5          | M                | 55           | 3TC, DLV, TFV, NFV                                                        | N/A                                  | 11                                                 |
|                    | H0011db   | Cy5          | M                | 35           |                                                                           |                                      |                                                    |
| Internal control   |           | Cy2          |                  |              |                                                                           |                                      |                                                    |

<sup>a</sup> HAD: HIV associated dementia; HAnD: HIV non-dementia

<sup>b</sup> M, male; F, female

N/A: no data available

AZT: zidovudine, ddl: didanosine, NVP: nevirapine, NFV: nelfinavir, ZDV: zidovudine, SQV: saquinavir, D4T: stavudine, 3TC: 2'-deoxy-3'-thiacytidine, FTV: foscarnet, RTV: raltegravir, ABC: abacavir, CBV: combivir, APV: amprenavir, TZV: trizivir, TFV: tenofovir, DLV: delavirdine
